# Supplementary material for: Cefiderocol against Multi-Drug and Extensively Drug-Resistant Escherichia coli: An In Vitro Study in Poland
Source: MDPI journal article supplement (doi:10.3390/pathogens11121508), 2022-12-09
Supplement: s1 [file s1]

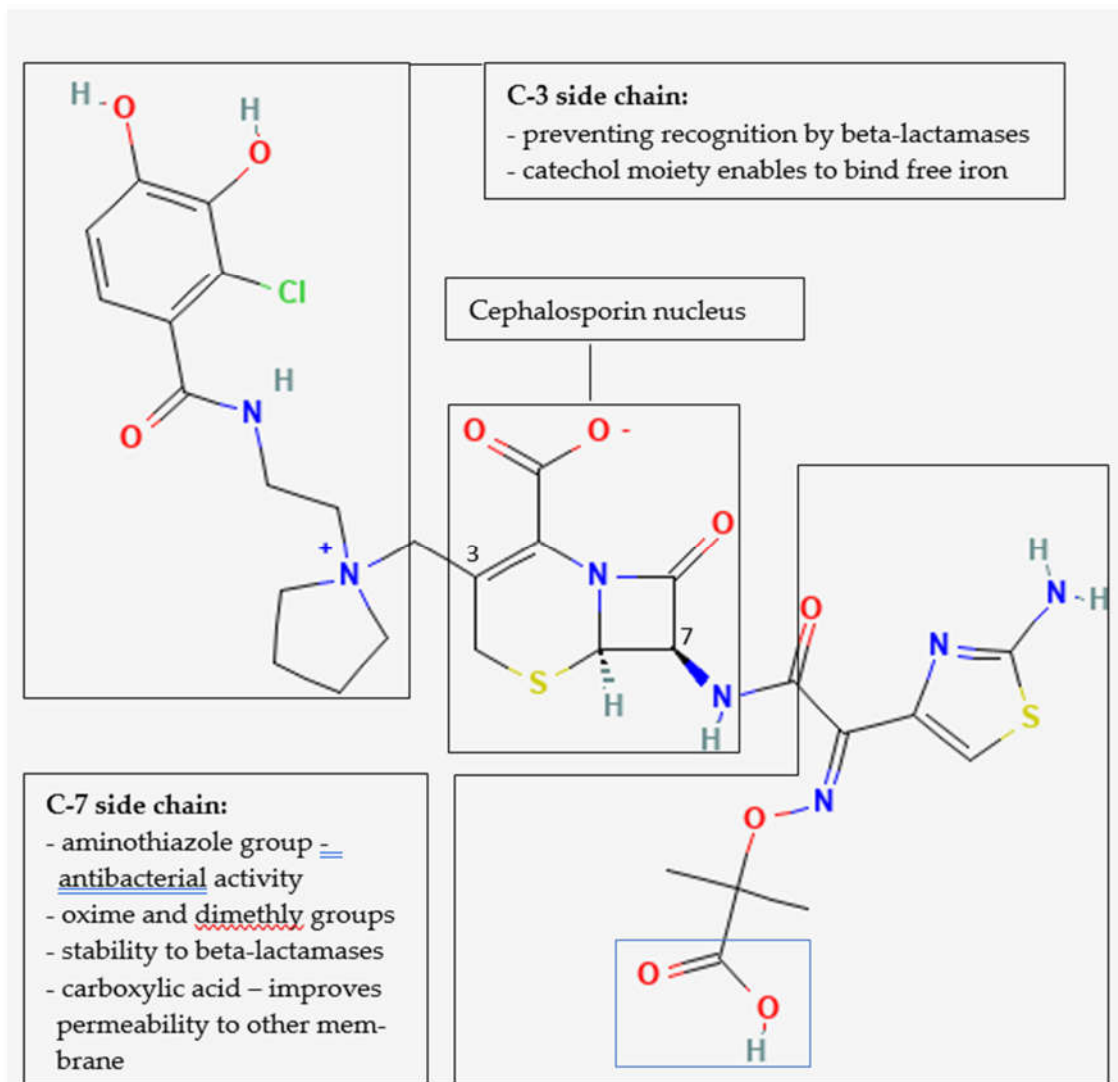

Figure S1. Chemical structure and important functional groups of cefiderocol ( $C_{30}H_{34}ClN_7O_{10}S_2$ ). Based on [10,12].

Table S1. Characteristics of *E. coli* isolates ( $n = 104$ ).

| Isolate No. | Collection date (month/year) | Department                    | Material   | Beta-Lactamase Genes     | CFDC [mm] | CFDC [SR] | CFDC MIC Value [ug/mL] | CFDC [SR] |
|-------------|------------------------------|-------------------------------|------------|--------------------------|-----------|-----------|------------------------|-----------|
| 34/H1       | 01/2022                      | Department of Urology         | urine      | <i>bla</i> CTX-M-1 group | 28        | S         | 0.023                  | S         |
| 1081/H1     | 01/2022                      | Department of Dermatology     | wound swab | <i>bla</i> CTX-M-1 group | 26        | S         | 0.25                   | S         |
| 2234/H1     | 01/2017                      | Department of Nephrology      | urine      | <i>bla</i> CTX-M-1 group | 28        | S         | 0.75                   | S         |
| 3526/H1     | 01/2022                      | Department of Endocrinology   | blood      | <i>bla</i> CTX-M-1 group | 30        | S         | 0.125                  | S         |
| 4746/H2     | 01/2021                      | Department of General Surgery | wound swab | <i>bla</i> CTX-M-1 group | 26        | S         | 0,38                   | S         |

|          |         |                                                   |                  |                          |    |   |        |   |
|----------|---------|---------------------------------------------------|------------------|--------------------------|----|---|--------|---|
| 5275/H1  | 01/2022 | Department of Cardiology                          | urine            | <i>bla</i> CTX-M-1 group | 16 | R | 4      | R |
| 5698/H1  | 02/2017 | Department of Urology                             | blood            | <i>bla</i> CTX-M-1 group | 29 | S | 0.125  | S |
| 5841/H1  | 02/2017 | Department of General Surgery                     | ab-dominal fluid | <i>bla</i> CTX-M-1 group | 27 | S | 0.38   | S |
| 7812/H1  | 01/2022 | Anesthesiology and Intensive Care Unit            | blood            | <i>bla</i> CTX-M-1 group | 26 | S | 0.19   | S |
| 11283/H1 | 02/2022 | Department of Pediatric Surgery                   | stoma swab       | <i>bla</i> CTX-M-1 group | 23 | S | 0.38   | S |
| 11898/H1 | 04/2016 | Bone Marrow Transplantation Department            | rectal swab      | <i>bla</i> VIM           | 24 | S | 0.5    | S |
| 12142/H1 | 02/2022 | Isolation (COVID-19) Department                   | urine            | <i>bla</i> CTX-M-1 group | 27 | S | 0.023  | S |
| 14134/H1 | 02/2022 | Stroke Department                                 | urine            | <i>bla</i> CTX-M-1 group | 30 | S | 0.19   | S |
| 14255/H1 | 05/2017 | Bone Marrow Transplantation Department            | rectal swab      | <i>bla</i> VIM           | 28 | S | 0.064  | S |
| 16948/H1 | 06/2016 | Department of Pediatrics, Hematology and Oncology | stool            | <i>bla</i> CTX-M-1 group | 25 | S | 0.094  | S |
| 17583/H1 | 02/2022 | Department of Nephrology                          | blood            | <i>bla</i> CTX-M-1 group | 29 | S | 0.19   | S |
| 17735/H1 | 02/2022 | Anesthesiology and Intensive Care Unit            | blood            | <i>bla</i> CTX-M-1 group | 22 | S | 0.75   | S |
| 18070/H1 | 06/2016 | Department of General Surgery                     | urine            | <i>bla</i> CTX-M-1 group | 24 | S | 0.5    | S |
| 18092/H1 | 06/2016 | Department of Infectious Diseases and Hepatology  | urine            | <i>bla</i> CTX-M-1 group | 32 | S | 0.032  | S |
| 19747/H1 | 07/2016 | Department of Pediatric Surgery                   | rectal swab      | <i>bla</i> CTX-M-9 group | 30 | S | 0.094  | S |
| 19999/H2 | 02/2022 | Department of Urology                             | urine            | <i>bla</i> CTX-M-1 group | 31 | S | 0.19   | S |
| 20368/H1 | 02/2022 | Department of Transplantology                     | urine            | <i>bla</i> CTX-M-1 group | 25 | S | 0.094  | S |
| 22332/H1 | 08/2016 | Neonatal Intensive Care and Neonatal Surgery Unit | rectal swab      | <i>bla</i> CTX-M-1 group | 28 | S | <0.016 | S |
| 23025/H1 | 08/2016 | Department of Endocrinology                       | urine            | <i>bla</i> CTX-M-9 group | 27 | S | 0.047  | S |
| 23493/H1 | 08/2016 | Department of Transplantology                     | urine            | <i>bla</i> CTX-M-1 group | 25 | S | 0.25   | S |
| 23778/H1 | 08/2016 | Department of Urology                             | blood            | <i>bla</i> CTX-M-1 group | 24 | S | 0.25   | S |
| 23913/H1 | 08/2016 | Department of Nephrology                          | urine            | <i>bla</i> CTX-M-1 group | 29 | S | 0.125  | S |
| 24633/H1 | 08/2016 | Department of Pediatrics, Hematology and Oncology | urine            | <i>bla</i> CTX-M-1 group | 26 | S | 0.25   | S |
| 25041/H1 | 03/2022 | Department of Urology                             | urine            | <i>bla</i> CTX-M-1 group | 26 | S | 0.25   | S |
| 25132/H1 | 09/2016 | Anesthesiology and Intensive Care Unit            | urine            | <i>bla</i> CTX-M-1 group | 30 | S | 0.25   | S |
| 25177/H1 | 09/2016 | Department of General Surgery                     | pleural fluid    | <i>bla</i> CTX-M-1 group | 23 | S | 0.75   | S |
| 25211/H1 | 09/2016 | Department of                                     | urine            | <i>bla</i> CTX-M-1 group | 27 | S | 0.38   | S |

|           |         |                                                   |                  |                                          |    |   |        |   |
|-----------|---------|---------------------------------------------------|------------------|------------------------------------------|----|---|--------|---|
| Neurology |         |                                                   |                  |                                          |    |   |        |   |
| 25941/H1  | 09/2017 | Department of Transplantology                     | urine            | <i>bla</i> CTX-M-1 group                 | 30 | S | <0.016 | S |
| 26116/H1  | 09/2016 | Department of Infectious Diseases and Hepatology  | blood            | <i>bla</i> CTX-M-1 group                 | 27 | S | 0.032  | S |
| 26542/H1  | 09/2016 | Department of Urology                             | urine            | <i>bla</i> CTX-M-1 group                 | 29 | S | 0.016  | S |
| 26644/H1  | 03/2022 | Geriatrics Clinic                                 | urine            | <i>bla</i> CTX-M-1 group                 | 25 | S | 0.064  | S |
| 26844/H1  | 09/2016 | Department of Transplantology                     | urine            | <i>bla</i> CTX-M-1 group                 | 27 | S | 0.125  | S |
| 27831/H1  | 10/2016 | Rehabilitation Clinic                             | urine            | <i>bla</i> CTX-M-1 group                 | 23 | S | 0.38   | S |
| 28085/H1  | 09/2017 | Department of General Surgery                     | ab-dominal fluid | <i>bla</i> CTX-M-9 group                 | 25 | S | 0.38   | S |
| 28667/H1  | 10/2016 | Department of Vascular Surgery                    | urine            | <i>bla</i> CTX-M-1 group                 | 28 | S | 0.25   | S |
| 28694/H1  | 10/2016 | Department of Pediatrics, Hematology and Oncology | stool            | <i>bla</i> CTX-M-1 group                 | 30 | S | 0.38   | S |
| 28884/H1  | 10/2016 | Department of Cardiology                          | urine            | <i>bla</i> CTX-M-1 group                 | 32 | S | 0.125  | S |
| 30208/H1  | 10/2016 | Department of Transplantology                     | urine            | <i>bla</i> CTX-M-1 group                 | 29 | S | 0.38   | S |
| 30632/H1  | 11/2016 | Department of Cardiology                          | urine            | <i>bla</i> CTX-M-1 group                 | 27 | S | 0.19   | S |
| 31572/H1  | 10/2018 | Bone Marrow Transplantation Department            | stool            | <i>bla</i> VIM                           | 25 | S | 0.75   | S |
| 32446/H1  | 11/2017 | Department of Transplantology                     | wound swab       | <i>bla</i> CTX-M-1 group                 | 26 | S | 0.5    | S |
| 40534/H1  | 12/2018 | Department of Cardiology                          | rectal swab      | <i>bla</i> VIM                           | 28 | S | 0.38   | S |
| 46134/H1  | 07/2022 | Department of Pediatrics, Hematology and Oncology | urine            | <i>bla</i> CTX-M-1 group                 | 23 | S | 0.38   | S |
| 53314/H1  | 08/2022 | Bone Marrow Transplantation Department            | rectal swab      | <i>bla</i> CTX-M-1 group                 | 26 | S | 0.125  | S |
| 54037/H1  | 08/2022 | Department of Transplantology                     | urine            | <i>bla</i> NDM                           | 14 | R | 4      | R |
| 58764/H1  | 07/2021 | Department of Cardiology                          | blood            | <i>bla</i> CTX-M-1 group                 | 34 | S | <0.016 | S |
| 59102/H1  | 06/2021 | Department of Pediatrics, Hematology and Oncology | blood            | <i>bla</i> VIM; <i>bla</i> CTX-M-1 group | 27 | S | 0.19   | S |
| 59134/H1  | 06/2021 | Department of Urology                             | urine            | <i>bla</i> CTX-M-1 group                 | 29 | S | 0.047  | S |
| 59835/H1  | 09/2022 | Department of Pediatrics, Hematology and Oncology | stool            | <i>bla</i> VIM                           | 21 | R | 0.75   | S |
| 81144/H2  | 01/2022 | Department of Cardiology                          | urine            | <i>bla</i> CTX-M-1 group                 | 29 | S | 0.19   | S |
| 81794/H2  | 01/2022 | Department of Hematology                          | blood            | <i>bla</i> CTX-M-1 group                 | 20 | R | 3      | R |

|           |         |                                        |                  |                                             |    |   |        |   |
|-----------|---------|----------------------------------------|------------------|---------------------------------------------|----|---|--------|---|
| 82267/H1  | 10/2021 | Department of General Surgery          | urine            | <i>bla</i> CTX-M-1 group                    | 29 | S | 0.064  | S |
| 83937/H1  | 10/2021 | Department of Cardiology               | urine            | <i>bla</i> CTX-M-1 group                    | 29 | S | 0.016  | S |
| 85010/H1  | 10/2021 | Anesthesiology and Intensive Care Unit | blood            | <i>bla</i> CTX-M-1 group                    | 27 | S | 0.047  | S |
| 85097/H2  | 01/2022 | Department of General Surgery          | ab-dominal fluid | <i>bla</i> CTX-M-1 group                    | 25 | S | 0.75   | S |
| 88036/H1  | 10/2021 | Department of Urology                  | urine            | <i>bla</i> CTX-M-1 group                    | 22 | S | 0.38   | S |
| 88280/H1  | 10/2021 | Department of Transplantology          | urine            | <i>bla</i> CTX-M-1 group                    | 28 | S | 0.125  | S |
| 89049/H1  | 10/2021 | Geriatrics Clinic                      | urine            | <i>bla</i> CTX-M-1 group                    | 28 | S | 0.023  | S |
| 90249/H2  | 02/2022 | Anesthesiology and Intensive Care Unit | urine            | <i>bla</i> CTX-M-1 group                    | 28 | S | 0.19   | S |
| 90439/H1  | 02/2022 | Department of Urology                  | urine            | <i>bla</i> CTX-M-1 group                    | 19 | R | 3      | S |
| 92779/H1  | 11/2021 | Department of Nephrology               | blood            | <i>bla</i> CTX-M-1 group                    | 29 | S | 0.094  | S |
| 100920/H1 | 12/2021 | Department of Endocrinology            | blood            | <i>bla</i> CTX-M-1 group                    | 31 | S | <0.016 | S |
| 101984/H1 | 12/2021 | Department of General Surgery          | ab-dominal fluid | <i>bla</i> CTX-M-1 group                    | 30 | S | 0.094  | S |
| 102135/H1 | 12/2021 | Department of Orthopedics              | urine            | <i>bla</i> CTX-M-1 group                    | 29 | S | 0.25   | S |
| 102240/H1 | 12/2021 | Isolation (COVID-19) Department        | urine            | <i>bla</i> CTX-M-1 group                    | 24 | S | 0.125  | S |
| 102692/H1 | 12/2021 | Geriatrics Clinic                      | urine            | <i>bla</i> CTX-M-1 group                    | 24 | S | <0.016 | S |
| 104118/H1 | 12/2021 | Department of Neurology                | urine            | <i>bla</i> CTX-M-1 group                    | 27 | S | 0.023  | S |
| 112217/H2 | 02/2020 | Department of General Surgery          | wound swab       | <i>bla</i> VIM                              | 22 | S | 1.5    | S |
| 247209/H2 | 04/2018 | Department of General Hematology       | urine            | <i>bla</i> VIM                              | 25 | S | 0.38   | S |
| 248648/H2 | 05/2018 | Department of General Hematology       | rectal swab      | <i>bla</i> OXA-48; <i>bla</i> CTX-M-9 group | 35 | S | <0.016 | S |
| 253278/H2 | 05/2018 | Department of Urology                  | urine            | <i>bla</i> CTX-M-1 group                    | 25 | S | 0.25   | S |
| 254364/H2 | 05/2018 | Anesthesiology and Intensive Care Unit | urine            | <i>bla</i> CTX-M-1 group                    | 30 | S | 0.064  | S |
| 256009/H2 | 05/2018 | Department of Cardiology               | urine            | <i>bla</i> CTX-M-1 group                    | 30 | S | 0.125  | S |
| 355159/H2 | 03/2019 | Department of Nephrology               | urine            | <i>bla</i> VIM                              | 23 | S | 1      | S |
| 358860/H2 | 03/2019 | Department of General Surgery          | ab-dominal fluid | <i>bla</i> CTX-M-1 group                    | 30 | S | 0.125  | S |
| 362095/H2 | 03/2019 | Department of Urology                  | urine            | <i>bla</i> CTX-M-9 group                    | 31 | S | 0.094  | S |
| 366607/H2 | 04/2019 | Department of Urology                  | urine            | <i>bla</i> CTX-M-1 group                    | 25 | S | 0.5    | S |
| 366844/H2 | 04/2019 | Department of Transplantology          | urine            | <i>bla</i> CTX-M-1 group                    | 26 | S | 0.38   | S |
| 368503/H2 | 04/2019 | Anesthesiology and Intensive Care Unit | urine            | <i>bla</i> CTX-M-1 group                    | 25 | S | 0.38   | S |
| 368329/H2 | 05/2020 | Anesthesiology and Intensive Care Unit | blood            | <i>bla</i> VIM                              | 13 | R | 4      | R |
| 371250/H2 | 06/2020 | Department of Cardiology               | urine            | <i>bla</i> CTX-M-1 group                    | 30 | S | 0.25   | S |
| 583499/H2 | 08/2020 | Department of                          | stool            | <i>bla</i> CTX-M-1 group                    | 24 | S | 0.125  | S |

|                                 |         |                                  |                 |                                          |    |   |       |   |
|---------------------------------|---------|----------------------------------|-----------------|------------------------------------------|----|---|-------|---|
|                                 |         | Hematology                       |                 |                                          |    |   |       |   |
| 641772/H2                       | 09/2020 | Department of Transplantology    | urine           | <i>bla</i> CTX-M-1 group                 | 32 | S | 0.125 | S |
| 652172/H2                       | 09/2020 | Department of General Surgery    | urine           | <i>bla</i> CTX-M-1 group                 | 28 | S | 0.094 | S |
| 488423/H2                       | 07/2018 | Department of Urology            | urine           | <i>bla</i> VIM                           | 33 | S | 0.016 | S |
| 659534/H2                       | 09/2018 | Department of Vascular Surgery   | rectal swab     | <i>bla</i> VIM                           | 27 | S | 0.19  | S |
| 659742/H2                       | 09/2018 | Department of Neurology          | urine           | <i>bla</i> CTX-M-1 group                 | 32 | S | 0.19  | S |
| 688208/H2                       | 10/2019 | Department of General Surgery    | rectal swab     | <i>bla</i> VIM                           | 23 | S | 2     | S |
| 698738/H2                       | 09/2021 | Department of Urology            | urine           | <i>bla</i> CTX-M-1 group                 | 25 | S | 0.38  | S |
| 699186/H2                       | 09/2021 | Geriatrics Clinic                | urine           | <i>bla</i> CTX-M-1 group                 | 31 | S | 0.32  | S |
| 719432/H2                       | 10/2018 | Department of Nephrology         | rectal swab     | <i>bla</i> VIM                           | 27 | S | 0.38  | S |
| 728539/H2                       | 10/2018 | Department of Urology            | wound swab      | <i>bla</i> CTX-M-1 group                 | 31 | S | 0.125 | S |
| 729149/H2                       | 10/2018 | Department of General Surgery    | abdominal fluid | <i>bla</i> CTX-M-1 group                 | 22 | S | 0.75  | S |
| 718779/H2                       | 10/2021 | Department of General Surgery    | blood           | <i>bla</i> CTX-M-1 group                 | 28 | S | 0.023 | S |
| 718873/H2                       | 10/2021 | Department of Urology            | urine           | <i>bla</i> CTX-M-1 group                 | 28 | S | 1.5   | S |
| 729272/H2                       | 11/2021 | Department of Cardiology         | urine           | <i>bla</i> CTX-M-1 group                 | 30 | S | 0.032 | S |
| 729907/H2                       | 11/2021 | Department of Transplantology    | urine           | <i>bla</i> CTX-M-1 group                 | 28 | S | 0.032 | S |
| 781123/H2                       | 12/2018 | Department of Cardiology         | urine           | <i>bla</i> VIM; <i>bla</i> CTX-M-1 group | 24 | S | 0.5   | S |
| 899239/H2                       | 12/2019 | Department of General Hematology | urine           | <i>bla</i> VIM                           | 24 | S | 1     | S |
| <i>E. coli</i> ATCC 25922       |         |                                  |                 |                                          | 28 | S | 0.064 | S |
| <i>P. aeruginosa</i> ATCC 27853 |         |                                  |                 |                                          | 25 | S | 0.125 | S |

MIC - minimum inhibitory concentration; S - susceptible; R – resistant.
